# Supplementary material
Source: Royal Society of Chemistry journal article supplement (doi:10.1039/d6tc00378h)
Supplement: d6tc00378h1.pdf [file d6tc00378h1.pdf]

# Chemically and Thermally Ultra-Stable Ba(II) Coordination Polymer with Dual Fluorescence Sensing and High Proton Conductivity

Yue Shu <sup>a,c†</sup>, Baoyi Li <sup>b†</sup>, Xuxing Chen <sup>c,\*</sup>, Chenrui Wang <sup>a,b</sup>, and Rong Li <sup>a,c,\*</sup>

*<sup>a</sup>Hubei Key Laboratory of Micro-Nanoelectronic Materials and Devices, School of Intelligent and manufacturing, Hubei University, Wuhan 430062, P. R. China*

*<sup>b</sup>Fujian Institute of Research on the Structure of Matter, Chinese Academy of Sciences, Fuzhou 350002, P. R. China*

*<sup>c</sup>School of Materials Science & Engineering, Hubei University, Wuhan 430062, P. R. China*

Corresponding authors: [cxx0613@hubu.edu.cn](mailto:cxx0613@hubu.edu.cn) (Xu-xing Chen), [rli@hubu.edu.cn](mailto:rli@hubu.edu.cn)  
(Rong Li)

<sup>†</sup> These authors contributed equally.

## Experimental section

All of the chemicals were purchased from commercial sources and were used without further purification. Metal ion salt BaBr<sub>2</sub> (99%) was purchased from Shanghai Aladdin Bio-Chem Technology Co., Ltd. 3,5-bis(3',5'-dicarboxyphenyl)-1H-1,2,4-triazole (97%) was from Jinan Henghua Technology Co., Ltd.

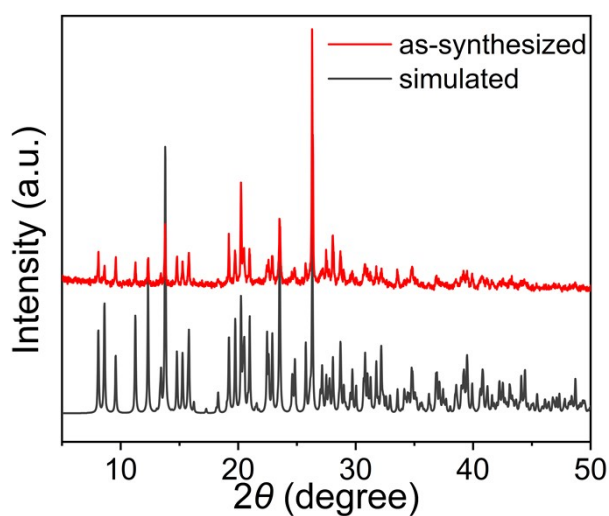

**Figure S1.** PXRD patterns of simulated and as-synthesized of **1**.

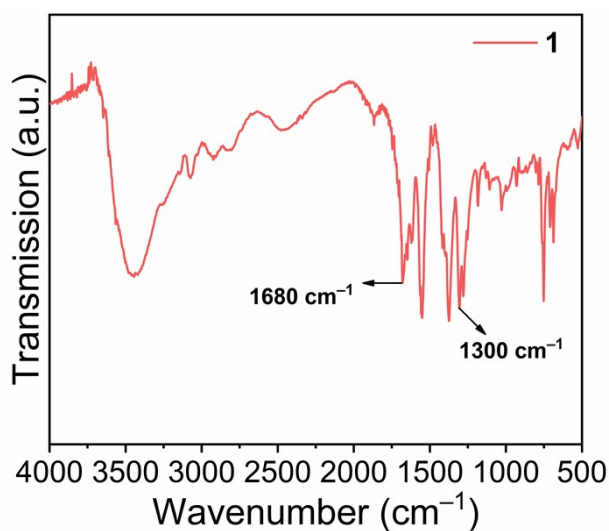

**Figure S2.** FT-IR spectrum for **1**.

† These authors contributed equally.

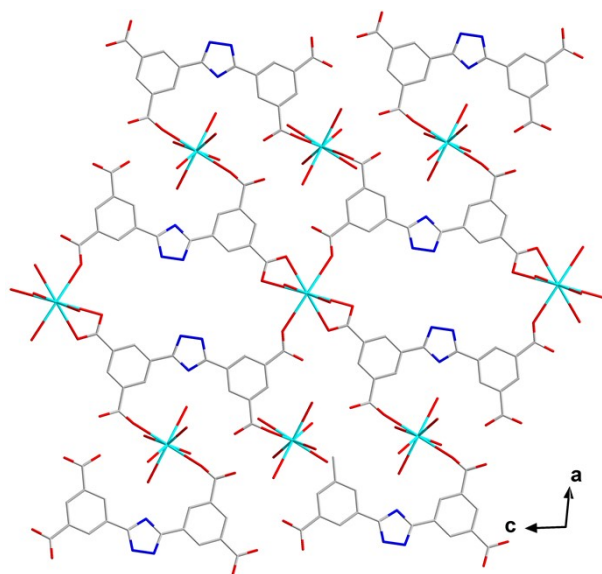

**Figure S3.** Two-dimensional coordination network of compound **1**.

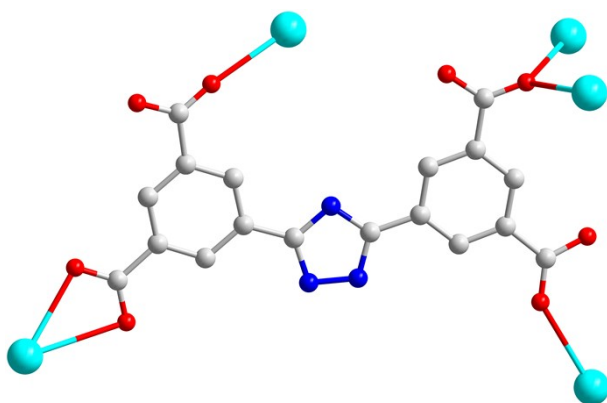

**Figure S4.**  $\text{H}_2\text{L}^{2-}$  coordination mode diagram.

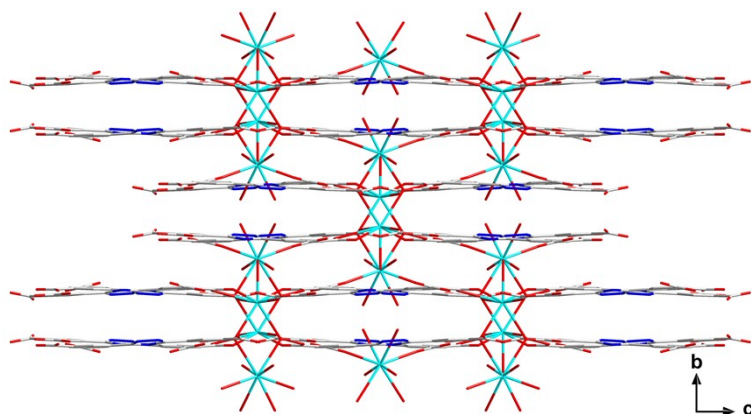

**Figure S5.** The  $\pi$ - $\pi$  stacking interactions in the framework **1**.

† These authors contributed equally.

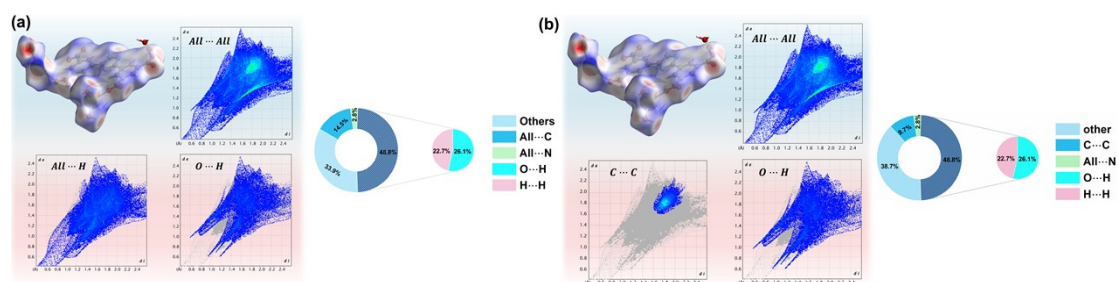

**Figure S6.** Hirshfeld surface analysis and 2D fingerprint plot of weak intermolecular interactions (a) highlighting O-H...O and O-H...N interactions, (b)  $\pi$ - $\pi$  stacking interactions.

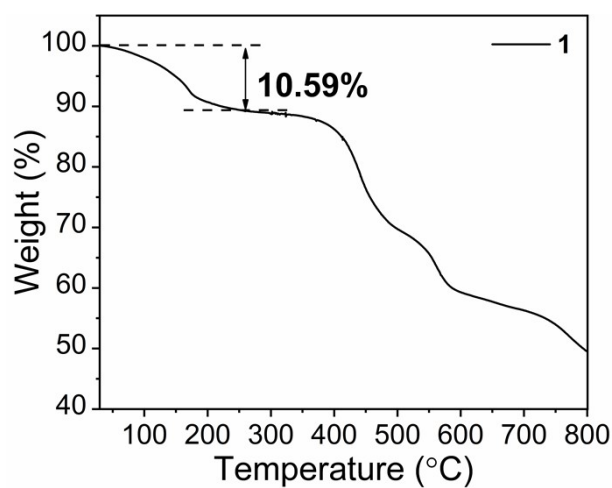

**Figure S7.** TGA curves for compound **1**, the inset is the curve between 30–80 °C.

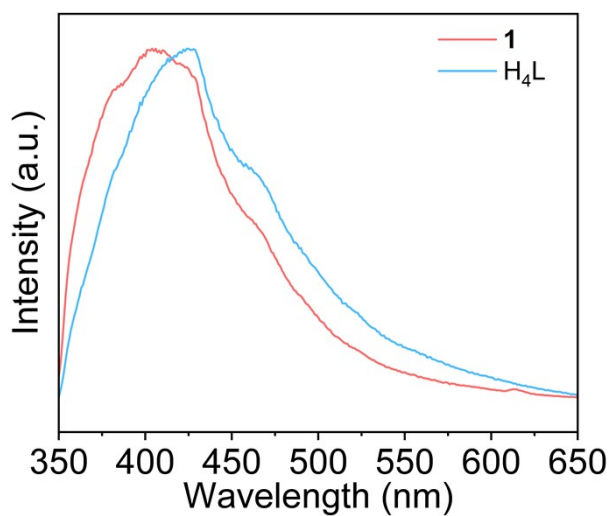

**Figure S8.** The solid-state emission spectrum of H<sub>4</sub>L and **1** at room temperature.

† These authors contributed equally.

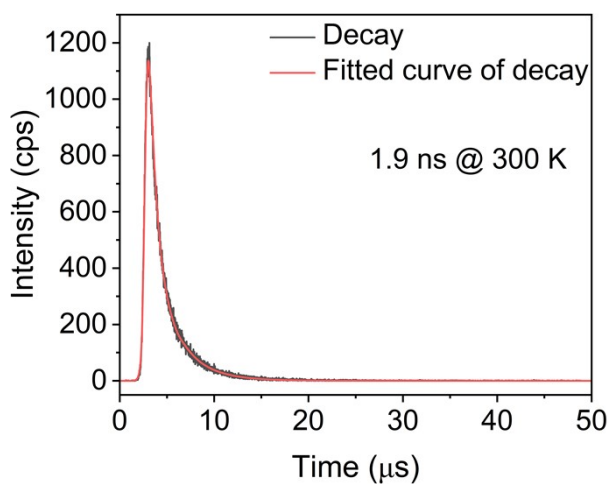

**Figure S9.** Decay lifetime plot of **1** ( $\lambda_{\text{ex}} = 350 \text{ nm}$ )

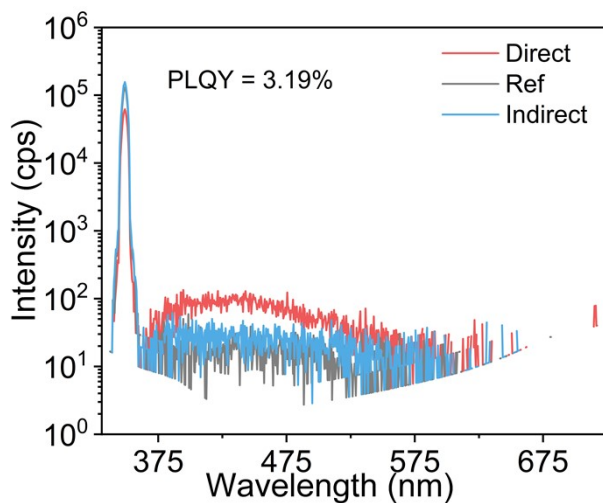

**Figure S10.** The PLQY of **1** at 300 K.

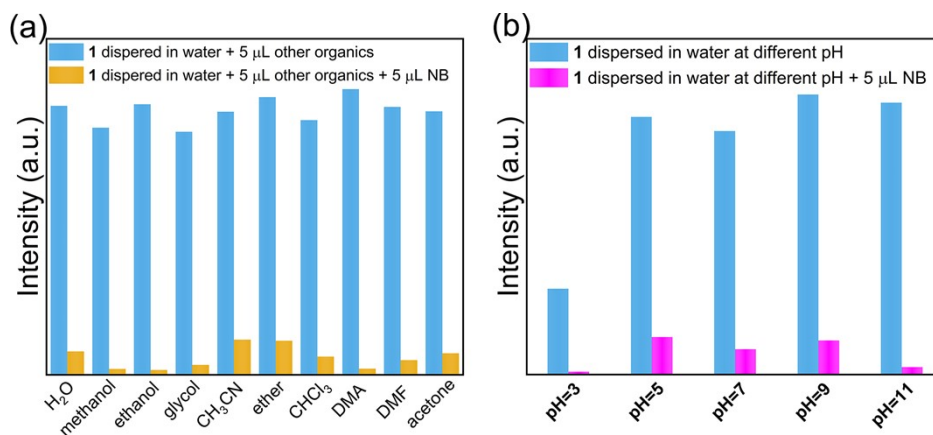

**Figure S11.** (a) Anti-interference study: NB detection unaffected by other organics, (b) pH-dependent selectivity toward NB (pH 3–11).

† These authors contributed equally.

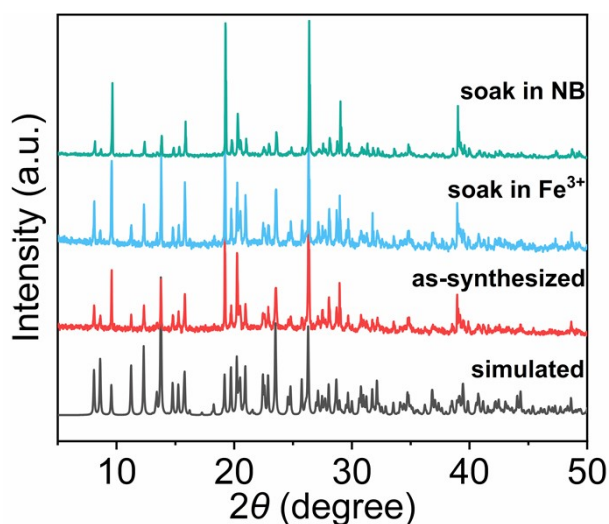

**Figure S12.** PXRD patterns of **1** after soaking in  $\text{Fe}^{3+}$  ion and NB solution for 24 h.

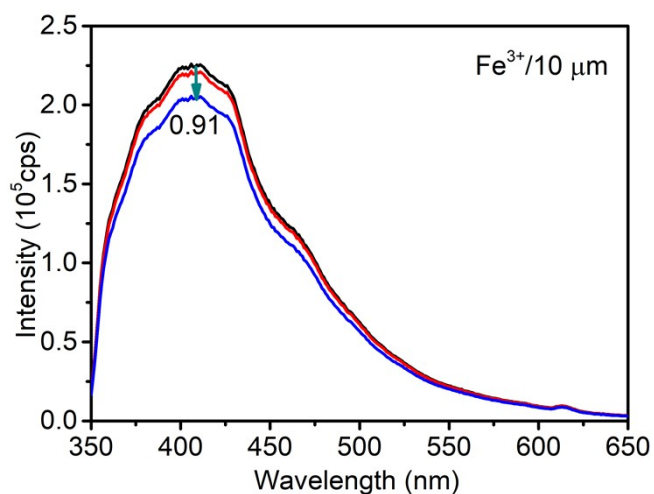

**Figure S13.** Reproducibility and reusability for compound **1** in  $\text{Fe}^{3+}$  sensing at  $10\ \mu\text{M}$ .

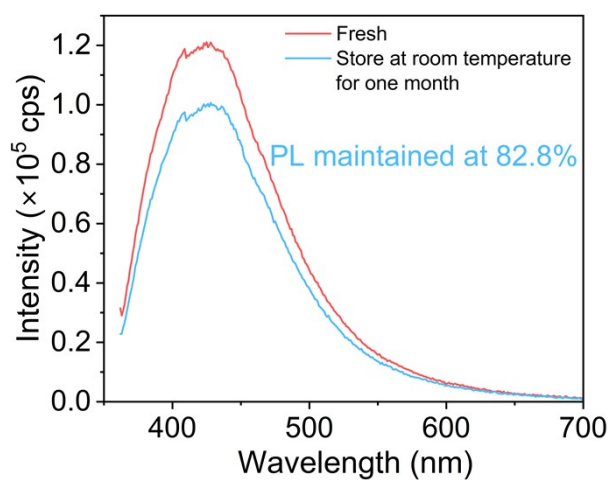

**Figure S14.** Fluorescence emission spectra of compound **1** before and after storage at room temperature for one month.

† These authors contributed equally.

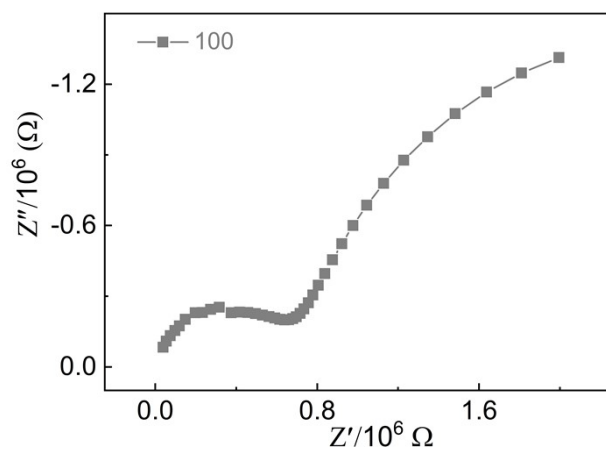

**Figure S15.** Nyquist plots at 25 °C under 100% RH.

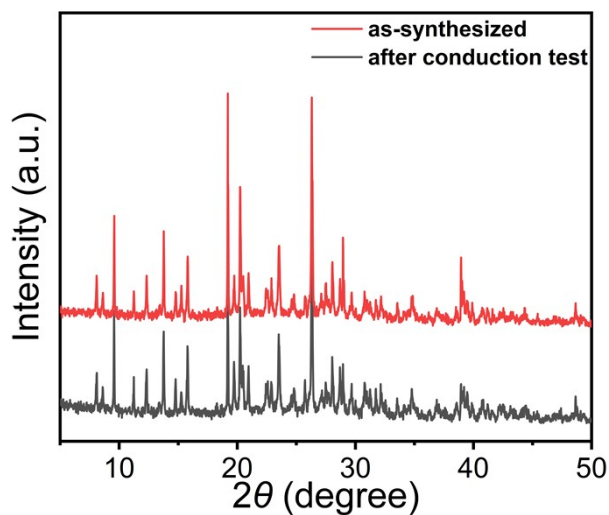

**Figure S16.** PXRD patterns of **1** after proton conduction test at 75 °C and 100% RH for 8 h.

**Table S1.** XRD Crystallographic Data for **1**

|                |                             |
|----------------|-----------------------------|
| CCDC           | 2523636                     |
| Formula        | $C_{18}H_{16}O_{11.5}N_3Ba$ |
| $F_w$          | 579.54                      |
| Temperature/K  | 299.83(10)                  |
| Crystal system | Monoclinic                  |
| Space group    | $I2/a$                      |
| $a/\text{Å}$   | 18.6600(5)                  |
| $b/\text{Å}$   | 13.5527(4)                  |

† These authors contributed equally.

|                                                           |               |
|-----------------------------------------------------------|---------------|
| $c/\text{\AA}$                                            | 15.8810(4)    |
| $\alpha/^\circ$                                           | 90            |
| $\beta/^\circ$                                            | 97.631(2)     |
| $\gamma/^\circ$                                           | 90            |
| $V/\text{\AA}^3$                                          | 3980.63(19)   |
| $Z$                                                       | 8             |
| $\rho_{\text{calc}} \text{ g/cm}^3$                       | 1.9339        |
| $\mu/\text{mm}^{-1}$                                      | 2.068         |
| $F(000)$                                                  | 2216.2        |
| Reflections collected                                     | 16485         |
| Independent reflections                                   | 4438          |
| Data/restraints/parameters                                | 4438/0/304    |
| $\theta$ range (deg)                                      | 3.72 to 58.62 |
| $R^1 [I \geq 2\sigma(I)]$                                 | 0.0410        |
| $wR^2$ [all data]                                         | 0.1288        |
| GOF on $F^2$                                              | 1.017         |
| $\rho_{\text{max}}/\rho_{\text{min}}, \text{ e \AA}^{-3}$ | 1.87/-1.37    |

$${}^a R_1 = \frac{\sum |F_o| - |F_c|}{\sum |F_o|}, \quad {}^b wR_2 = \frac{[\sum w(F_o^2 - F_c^2)^2]}{[\sum w(F_o^2)^2]}^{1/2}.$$

**Table S2.** Selected lengths ( $\text{\AA}$ ) and angles ( $^\circ$ ) for the as-synthesized crystals of **1**.

| Atom–Atom            | Length/ $\text{\AA}$ |
|----------------------|----------------------|
| Ba2–Ba1 <sup>1</sup> | 4.7129(4)            |
| Ba2–O3 <sup>1</sup>  | 2.813(2)             |
| Ba2–O3 <sup>2</sup>  | 2.813(2)             |
| Ba2–O8               | 2.680(2)             |
| Ba2–O8 <sup>3</sup>  | 2.680(2)             |
| Ba2–O2W              | 2.741(3)             |
| Ba2–O2W <sup>3</sup> | 2.741(3)             |
| Ba2–O1W <sup>3</sup> | 2.749(4)             |

<sup>†</sup> These authors contributed equally.

|                     |          |
|---------------------|----------|
| Ba2–O1W             | 2.749(4) |
| Ba1–O3              | 2.822(2) |
| Ba1–O3 <sup>4</sup> | 2.822(2) |
| Ba1–O6 <sup>5</sup> | 2.822(3) |
| Ba1–O6 <sup>6</sup> | 2.822(3) |
| Ba1–O2 <sup>7</sup> | 2.876(3) |
| Ba1–O2 <sup>8</sup> | 2.876(3) |
| Ba1–O5 <sup>5</sup> | 3.072(3) |
| Ba1–O5 <sup>6</sup> | 3.072(3) |

---

|         |          |
|---------|----------|
| Ba1–O3W | 2.674(5) |
|---------|----------|

| Atom–Atom–Atom                       | Angle/°    |
|--------------------------------------|------------|
| O5 <sup>7</sup> –Ba1–O5 <sup>8</sup> | 151.73(15) |
| O3 <sup>2</sup> –Ba2–O3 <sup>1</sup> | 66.59(10)  |
| O3W–Ba1–O3 <sup>4</sup>              | 146.83(5)  |
| O3W–Ba1–O3                           | 146.82(5)  |
| O3W–Ba1–O6 <sup>8</sup>              | 72.91(7)   |
| O3W–Ba1–O6 <sup>7</sup>              | 72.91(7)   |
| O3W–Ba1–O2 <sup>6</sup>              | 85.82(8)   |
| O83–Ba2–O3 <sup>2</sup>              | 74.82(9)   |
| O8–Ba2–O31                           | 74.82(9)   |
| O83–Ba2–O3 <sup>1</sup>              | 139.93(9)  |
| O8–Ba2–O3 <sup>2</sup>               | 139.93(9)  |
| O8–Ba2–O8 <sup>3</sup>               | 144.95(15) |
| O8–Ba2–O2W                           | 99.11(9)   |
| O8–Ba2–O2W3                          | 89.38(9)   |
| O83–Ba2–O2W3                         | 99.11(9)   |
| O83–Ba2–O2W                          | 89.38(9)   |

† These authors contributed equally.

|                                       |            |
|---------------------------------------|------------|
| O83–Ba2–O1W                           | 85.17(13)  |
| O83–Ba2–O1W3                          | 66.14(14)  |
| O8–Ba2–O1W3                           | 85.17(13)  |
| O8–Ba2–O1W                            | 66.14(14)  |
| O3W–Ba1–O2 <sup>5</sup>               | 85.82(8)   |
| O3W–Ba1–O5 <sup>7</sup>               | 75.86(7)   |
| O3W–Ba1–O5 <sup>8</sup>               | 75.86(7)   |
| O2W–Ba2–O3 <sup>2</sup>               | 81.37(9)   |
| O2W–Ba2–O3 <sup>1</sup>               | 74.96(9)   |
| O2W <sup>3</sup> –Ba2–O3 <sup>2</sup> | 74.96(9)   |
| O2W <sup>3</sup> –Ba2–O3 <sup>1</sup> | 81.37(9)   |
| O2W <sup>3</sup> –Ba2–O2W             | 151.65(15) |
| O2W–Ba2–O1W                           | 70.95(16)  |
| O2W–Ba2–O1W3                          | 136.38(16) |
| O2W <sup>3</sup> –Ba2–O1W             | 136.38(16) |
| O2W <sup>3</sup> –Ba2–O1W3            | 70.95(16)  |
| O1W–Ba2–O3 <sup>1</sup>               | 121.91(11) |
| O1W–Ba2–O3 <sup>2</sup>               | 145.93(15) |
| O1W <sup>3</sup> –Ba2–O3 <sup>2</sup> | 121.91(11) |
| O1W <sup>3</sup> –Ba2–O3 <sup>1</sup> | 145.93(15) |

**Symmetry codes for 1:** <sup>1</sup>  $x, 1/2 - y, 1/2 + z$ ; <sup>2</sup>  $1/2 - x, 1/2 - y, 1/2 - z$ ; <sup>3</sup>  $1/2 - x, y, 1 - z$ ; <sup>4</sup>  $1/2 - x, y, -z$ ; <sup>5</sup>  $1 - x, 1 - y, -z$ ; <sup>6</sup>  $-1/2 + x, 1 - y, z$ ; <sup>7</sup>  $1 - x, 1 - y, 1 - z$ ; <sup>8</sup>  $-1/2 + x, 1 - y, -1 + z$ .

**Table S3.** The geometrical parameters of  $\pi$ – $\pi$  interactions between aromatic rings in **1** calculated by the PLATON software.

| Cg(I)–Cg(J) | Cg–Cg(Å)   | $\alpha$ (°) | $\beta$ (°) | $\gamma$ (°) | CgI_Perp(Å) | CgJ_Perp(Å) | Slippage(Å) |
|-------------|------------|--------------|-------------|--------------|-------------|-------------|-------------|
| Cg1–Cg3     | 3.7504(17) | 1.83(14)     | 25.2        | 26.8         | 3.3476(11)  | 3.3936(12)  | 1.597       |
| Cg2–Cg3     | 3.6340(17) | 4.76(14)     | 16.0        | 19.8         | 3.4202(11)  | 3.4930(12)  | 1.002       |

† These authors contributed equally.

|         |            |          |      |      |            |            |       |
|---------|------------|----------|------|------|------------|------------|-------|
| Cg3–Cg2 | 3.7505(17) | 1.83(14) | 26.8 | 25.2 | 3.3935(12) | 3.3477(11) | 1.691 |
| Cg3–Cg2 | 3.6340(17) | 4.76(14) | 19.8 | 16.0 | 3.4930(12) | 3.4201(11) | 1.228 |

**Table S4.** Hydrogen bonds information within **1**.

| D–H      | A   | $d(\text{D–H})$ (Å) | $d(\text{H...A})$ (Å) | $d(\text{D...A})$ (Å) | $\angle\text{DHA}$ |
|----------|-----|---------------------|-----------------------|-----------------------|--------------------|
| O1–H1    | O6  | 0.82                | 1.70                  | 2.516(4)              | 170                |
| O2W–H2WA | O7  | 0.85                | 1.99                  | 2.833(4)              | 168                |
| N1–H1A   | O4W | 0.86                | 1.95                  | 2.737(6)              | 152                |
| N1–H1A   | O4X | 0.86                | 1.95                  | 2.789(12)             | 166                |
| O2W–H2WB | N3  | 0.85                | 2.24                  | 3.032(4)              | 155                |
| O3W–H3WA | N2  | 0.85                | 2.05                  | 2.892(4)              | 173                |
| O3W–H3WB | N2  | 0.85                | 2.13                  | 2.982(4)              | 150                |
| O1W–H1WA | N2  | 0.85                | 2.54                  | 2.926(6)              | 109                |
| O1W–H1WB | O4  | 0.85                | 2.35                  | 3.184(5)              | 165                |
| O7–H7    | O4  | 0.82(3)             | 1.68(3)               | 2.493(4)              | 174(9)             |
| O4W–H4WA | O5  | 0.85                | 1.90                  | 2.675(6)              | 151                |
| O4W–H4WB | O5  | 0.85                | 2.32                  | 3.135(10)             | 160                |

**Table S5.** Summary of SHAPE analysis for **1**

| Metal | label  | shape                        | symmetry | Distortion( $\tau$ ) |
|-------|--------|------------------------------|----------|----------------------|
|       | EP-9   | Enneagon                     | $D_{9h}$ | 31.555               |
|       | OPY-9  | Octagonal pyramid            | $C_{8v}$ | 24.906               |
| Ba1   | HBPY-9 | Heptagonal bipyramid         | $D_{7h}$ | 13.891               |
|       | JTC-9  | Johnson triangular cupola J3 | $C_{3v}$ | 13.340               |
|       | JCCU-9 | Capped cube J8               | $C_{4v}$ | 8.099                |

† These authors contributed equally.

|     |              |                                            |                       |              |
|-----|--------------|--------------------------------------------|-----------------------|--------------|
|     | <b>CCU-9</b> | <b>Spherical-relaxed capped cube</b>       | <b>C<sub>4v</sub></b> | <b>7.225</b> |
|     | JCSAPR-9     | Capped square antiprism<br>J10             | C <sub>4v</sub>       | 11.555       |
|     | CSAPR-9      | Spherical capped square antiprism          | C <sub>4v</sub>       | 10.874       |
|     | JTCTPR-9     | Tricapped trigonal prism<br>J51            | D <sub>3h</sub>       | 11.279       |
|     | OP-8         | Octagon                                    | D <sub>8h</sub>       | 31.752       |
|     | HPY-8        | Heptagonal pyramid                         | C <sub>7v</sub>       | 23.098       |
|     | HBPY-8       | Hexagonal bipyramid                        | D <sub>6h</sub>       | 12.642       |
| Ba2 | CU-8         | Cube                                       | O <sub>h</sub>        | 9.181        |
|     | SAPR-8       | Square antiprism                           | D <sub>4d</sub>       | 1.763        |
|     | <b>TDD-8</b> | <b>Triangular dodecahedron</b>             | <b>D<sub>2d</sub></b> | <b>1.731</b> |
|     | JGBF-8       | Johnson gyrobifastigium<br>J26             | D <sub>2d</sub>       | 11.874       |
|     | JETBPY-8     | Johnson elongated triangular bipyramid J14 | D <sub>3h</sub>       | 28.455       |

**Table S6.** Single crystal data for crystals immersed in solutions of different pH values.

|          | a      | B       | c      | $\alpha$ | B     | $\Gamma$ |
|----------|--------|---------|--------|----------|-------|----------|
| <b>1</b> | 18.660 | 13.5527 | 15.881 | 90       | 97.63 | 90       |
| pH=3     | 18.646 | 13.531  | 15.874 | 90       | 97.65 | 90       |
| pH=5     | 18.659 | 13.557  | 15.894 | 90       | 97.56 | 90       |
| pH=7     | 18.718 | 13.592  | 15.937 | 90       | 97.62 | 90       |
| pH=9     | 18.652 | 13.551  | 15.874 | 90       | 97.57 | 90       |
| pH=11    | 18.618 | 13.512  | 15.871 | 90       | 97.60 | 90       |

**Table S7.** Literature comparison of fluorescence quenching sensitivity ( $K_{SV}$ ) and proton conductivity ( $\sigma$ ).

† These authors contributed equally.

| Materials (year)                                                                                    | $K_{SV} / M^{-1}$                                                                     | Proton                                                     |               | Key notes / comparison focus                                                                                                                                        | Ref                       |
|-----------------------------------------------------------------------------------------------------|---------------------------------------------------------------------------------------|------------------------------------------------------------|---------------|---------------------------------------------------------------------------------------------------------------------------------------------------------------------|---------------------------|
|                                                                                                     |                                                                                       | conductivity<br>$\sigma / S \cdot cm^{-1}$<br>(conditions) | $E_a$<br>(eV) |                                                                                                                                                                     |                           |
| {[Ba(H <sub>2</sub> L)(H <sub>2</sub> O) <sub>2.5</sub> ]·H <sub>2</sub> O} <sub>n</sub><br>(Ba-CP) | Fe <sup>3+</sup> :<br>3.39×10 <sup>3</sup> ;<br>Nitrobenzene:<br>1.18×10 <sup>3</sup> | 1.99×10 <sup>-4</sup> (75<br>°C, 100% RH)                  | 0.36          | dual function (Fe <sup>3+</sup> + NB sensing + measurable $\sigma$ ). Most literature reports either sensing or proton transport only.                              | <a href="#">This work</a> |
| [Dy(spasds)(H <sub>2</sub> O) <sub>2</sub> ] <sub>n</sub><br>(Dy-CP, 2024)                          | Fe <sup>3+</sup> :<br>4.84×10 <sup>4</sup>                                            | —                                                          | —             | Much higher Fe <sup>3+</sup> $K_{SV}$ , but no proton-transport data reported (cannot benchmark multifunctionality).                                                | <a href="#">S1</a>        |
| [ZnL(dpa)] <sub>n</sub><br>(Zn-CP, 2024)                                                            | Fe <sup>3+</sup> :<br>3.09×10 <sup>4</sup>                                            | —                                                          | —             | High Fe <sup>3+</sup> KSV (10 <sup>4</sup> level); quenching attributed largely to competitive absorption/coordination; no $\sigma$ reported.                       | <a href="#">S2</a>        |
| TbCu-1 heterometallic MOF<br>(2026)                                                                 | Nitrobenzene:<br>9.47×10 <sup>3</sup>                                                 | —                                                          | —             | Good NB sensitivity (10 <sup>3</sup> –10 <sup>4</sup> ); focuses on guest-dependent luminescence; no $\sigma$ reported.                                             | <a href="#">S3</a>        |
| MOF-Ba<br>(alkaline-earth MOF, 2024)                                                                | —                                                                                     | 1.28×10 <sup>-3</sup> (65<br>°C, 98% RH)                   | —             | $\sigma$ is higher than this work, but fluorescence sensing was not a target/claimed; illustrates that boosting $\sigma$ often comes without sensing functionality. | <a href="#">S4</a>        |
| Sulfonate CPs / MMMs                                                                                | —                                                                                     | 1.34×10 <sup>-3</sup> (80                                  | —             | Representative recent                                                                                                                                               | <a href="#">S5</a>        |

† These authors contributed equally.

| Materials (year)                               | $K_{SV}/ M^{-1}$ | Proton                                                                                                            |               | Key notes / comparison<br>focus                                                                                                                                | Ref |
|------------------------------------------------|------------------|-------------------------------------------------------------------------------------------------------------------|---------------|----------------------------------------------------------------------------------------------------------------------------------------------------------------|-----|
|                                                |                  | conductivity<br>$\sigma/S \cdot cm^{-1}$<br>(conditions)                                                          | $E_a$<br>(eV) |                                                                                                                                                                |     |
| (2024)                                         |                  | °C, 95% RH,<br>MMM based<br>on Cu-SAT);<br>$0.91 \times 10^{-3}$ (80<br>°C, 95% RH,<br>Ca-<br>NDS(water)-<br>MMM) |               | CP/MOF<br>proton<br>conductors; emphasize that<br>state-of-the-art $\sigma$ is usually<br>achieved in membranes;<br>sensing metrics are not<br>provided.       |     |
| Ni-BAND hydrogen-bonded<br>CP thin film (2025) | —                | 0.09 (room<br>temperature,<br>RH > 90%)                                                                           | —             | Exceptional $\sigma$ at room<br>temperature (thin film) for<br>mixed protonic–electronic<br>conductor; far from typical<br>luminescent-sensor design<br>space. | S6  |

Note: “—” indicates the corresponding value was not reported in the cited work.

**Table S8.** The proton conductivity of **1** at variable temperatures under 100% RH.

| $T/^\circ C$ | $\sigma / S \cdot cm^{-1}$ |
|--------------|----------------------------|
| 25           | $3.08 \times 10^{-5}$      |
| 35           | $4.96 \times 10^{-5}$      |
| 45           | $7.54 \times 10^{-5}$      |
| 65           | $1.46 \times 10^{-4}$      |
| 75           | $1.99 \times 10^{-4}$      |

## References

† These authors contributed equally.

- S1. Y. Wang, B. An, S. Li, L. Chen, L. Tao, T. Fang and L. Guan, *Molecules*, 2024, **29**, 4495.
- S2. B. Zhao, J. Lu, H. Liu, S. Li, Q. Sun and B. Zhang, *CrystEngComm*, 2024, **26**, 1319–1327.
- S3. G.-L. Zhu, A.-N. Dou, S. Yin, L.-B. Yang, W.-H. Mu, R.-R. Zhu and A.-X. Zhu, *Dyes Pigments*, 2026, **245**, 113252.
- S4. G. Luo, S. Zhang, S.-L. Zhang, D. Zhou, C. Huang, D. Chen, B. Zhu, J. Yang and L. Shen, *J. Mol. Struct.*, 2024, **1299**, 137145.
- S5. C. Sun, C. M. Pask, S. T. Pham, E. Rapaccioli, A. J. Britton, S. Micklethwaite, A. Bell, M. O. Besenhard, R. Drummond-Brydson, K.-J. Wu and S. M. Collins, *J. Mater. Chem. A*, 2024, **12**, 18440–18451.
- S6. M. Park, H. Ju, J. Oh, K. Park, H. Lim, S. M. Yoon, I. Song, *Nat. Commun.*, 2025, **16**, 1316.

† These authors contributed equally.
